# Supplementary material for: Heat Scanning for the Fabrication of Conductive Fibers
Source: MDPI journal article supplement (doi:10.3390/polym13091405), 2021-04-26
Supplement: s1 [file s1]

Supplementary Material

# Heat Scanning for the Fabrication of Conductive Fibers

Jina Jang <sup>1</sup>, Haoyu Zhou <sup>2</sup>, Jungbae Lee <sup>1</sup>, Hakgae Kim <sup>1</sup> and Jung Bin In <sup>1,2,\*</sup>

<sup>1</sup> Soft Energy Systems and Laser Applications Laboratory, School of Mechanical Engineering, Chung-Ang University, Seoul 06974, Korea; jangjina94@cau.ac.kr (J.J.); skzzjd@cau.ac.kr (J.L.); haggai514@cau.ac.kr (H.K.)

<sup>2</sup> Department of Intelligent Energy and Industry, Chung-Ang University, Seoul 06974, Korea; zhouhaoyu@cau.ac.kr

\* Correspondence: jbin@cau.ac.kr

## Resistance change with coating sweeps

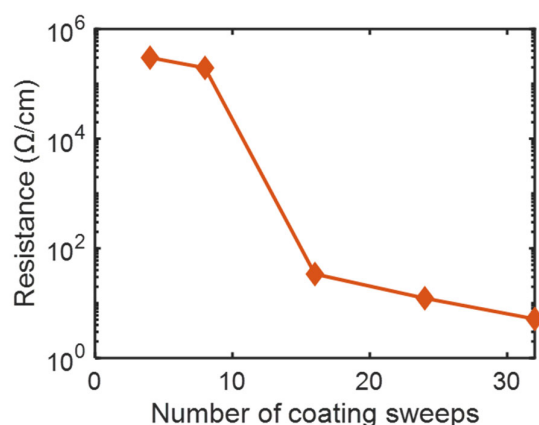

**Figure S1.** Changes in electrical resistance for AgNP-deposited nylon fibers prepared by using different numbers of AgNP coating sweeps (3 min/cm, 7.2 W).

## Thermal damage of hotplate sintering

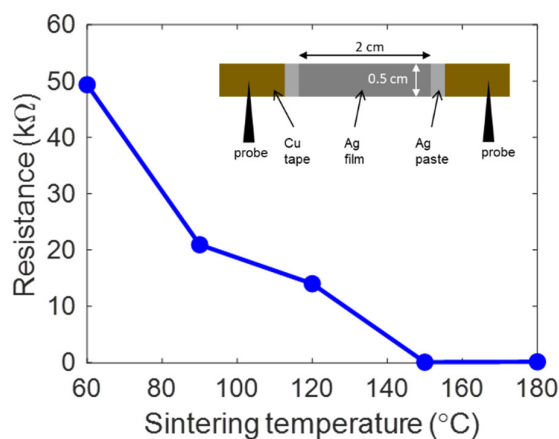

**Figure S2.** The resistances of AgNP films (size: 0.5 cm × 2 cm) sintered at different temperatures for 10 min, which reveals a threshold temperature for sintering at ~150 °C.

**Citation:** Jang, J.; Zhou, H.; Lee, J.; Kim, H.; In, J.B. Heat Scanning for the Fabrication of Conductive Fibers. *Polymers* **2021**, *13*, 1405. <https://doi.org/10.3390/polym13091405>

Academic Editor: Victor Tcheryntsev

Received: 8 April 2021

Accepted: 25 April 2021

Published: 26 April 2021

**Publisher's Note:** MDPI stays neutral with regard to jurisdictional claims in published maps and institutional affiliations.

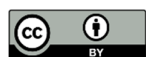

**Copyright:** © 2021 by the authors. Licensee MDPI, Basel, Switzerland. This article is an open access article distributed under the terms and conditions of the Creative Commons Attribution (CC BY) license (<http://creativecommons.org/licenses/by/4.0/>).

### Size distribution of AgNPs

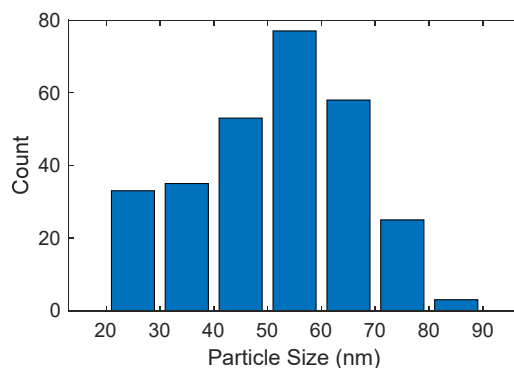

**Figure S3.** Size distribution of sintered AgNPs (7.2 W, 0.5 min/cm) on a nylon fiber.

### Composition of deposited AgNP layer

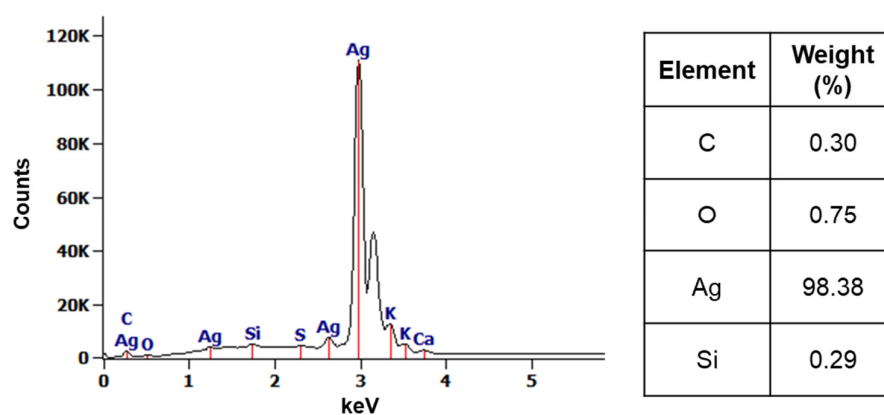

**Figure S4.** EDX spectrum of the deposited AgNP layer (left) and the calculated elemental composition (right).

## ER-AgNP/AgNW and ER-AgNW/AgNP

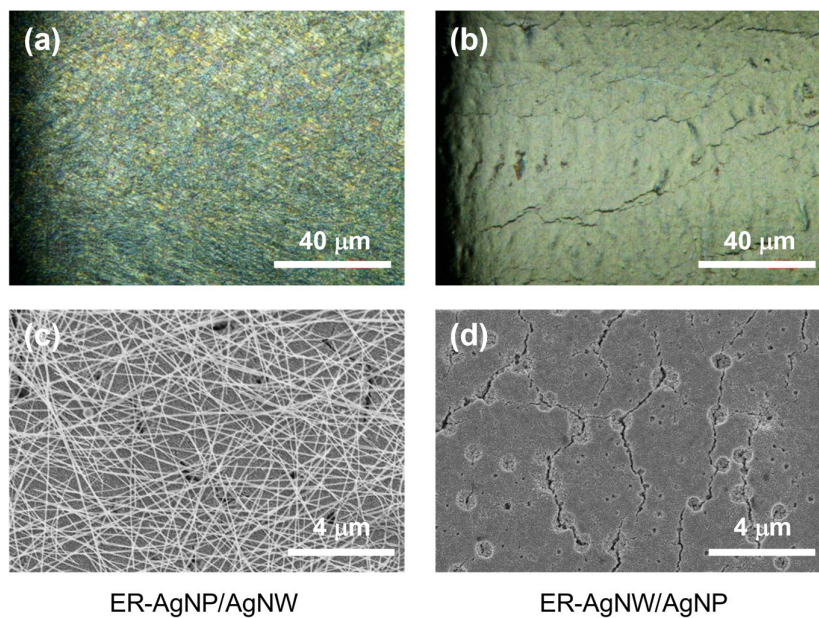

**Figure S5.** Optical microscopy images and SEM images for (a, c) ER-AgNP/AgNW and (b, d) ER-AgNW/AgNP.

## Changes in resistance with coating sweeps for ER-AgNW fibers

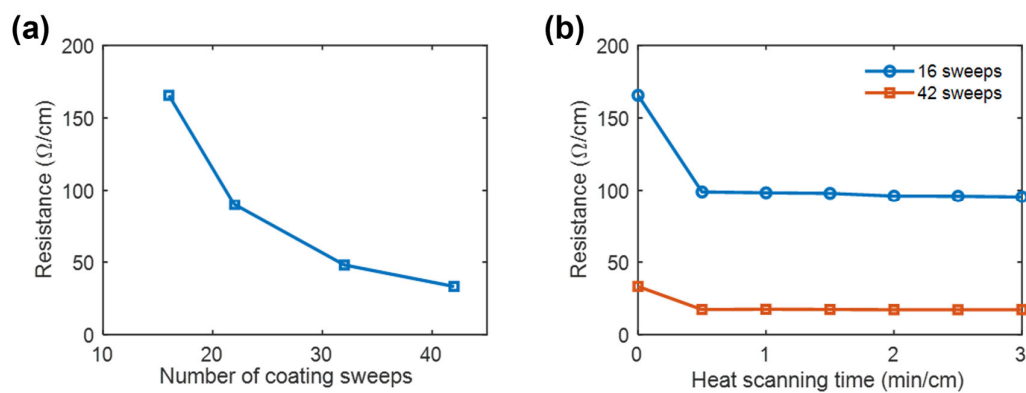

**Figure S6.** (a) Changes in resistance for ER-AgNW nylon fibers prepared by using different numbers of coating sweeps (0.5 min/cm, 7.2 W). (b) Changes in resistance across heat scanning time for the ER-AgNW nylon fibers prepared with 16 and 42 coating sweeps.
